# Supplementary material
Source: Springer Nature journal article supplement (https://www.springermedizin.de/resource/supplementary/12890_2013_499_MOESM5_ESM.pdf/9505638)

Normoxia

Hyperoxia

D5

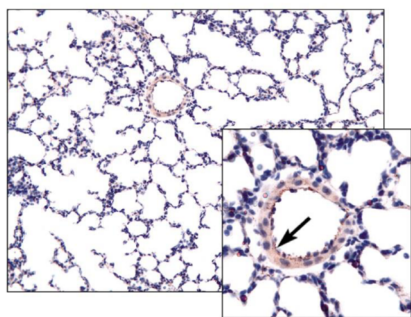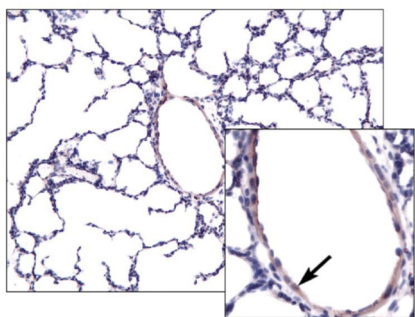

D28

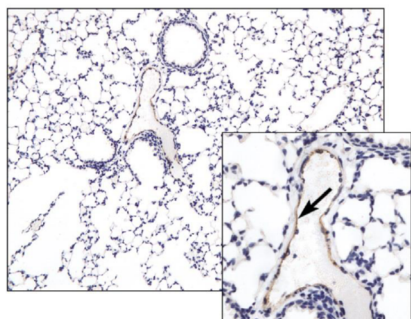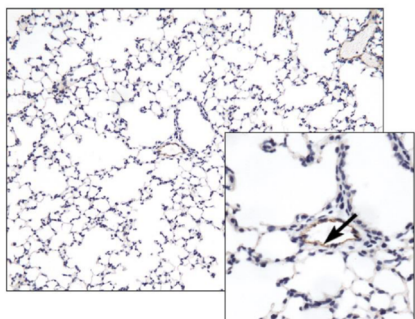

D56

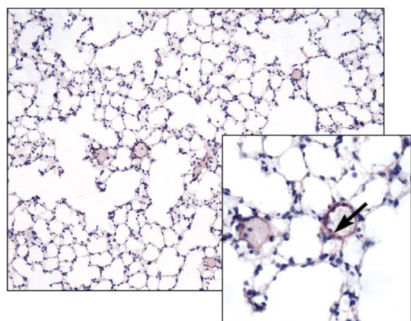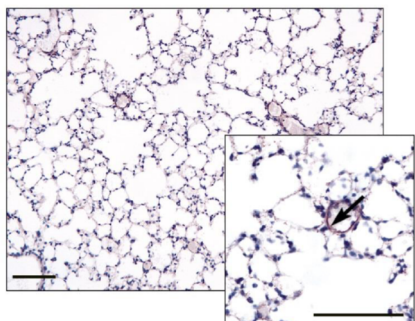

A

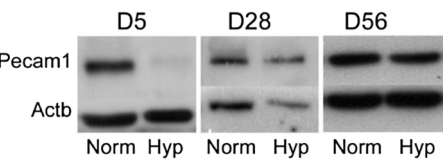

B

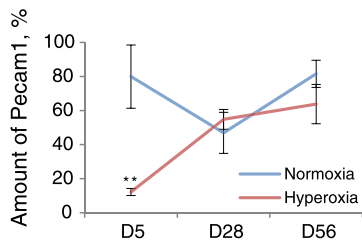

C

Supplement: MOESM5 [file 9505638]
